# Supplementary material for: Structural network disruption markers explain disability in multiple sclerosis
Source: PubMed Central journal article supplement (PMC6518973; doi:10.1136/jnnp-2018-318440), 2018-11-22
Supplement: jnnp-2018-318440supp003.pdf [file jnnp-2018-318440supp003.pdf]

# 1 Supplemental Methods

## 2 A. Participants

3 The study included 58 RRMS (40F, mean age  $49 \pm 12$  years), 28 PPMS (18F, mean age  $46 \pm$   
4  $9$  years) and 36 SPMS (28F, mean age  $52 \pm 7$  years) patients who had not experienced relapses  
5 within the preceding 4 weeks. Fifty-one healthy controls (HCs; 26F, mean age [ $\pm$ SD]  $41 \pm 13$   
6 years) who had no known neurological or psychiatric disorder were also recruited. All MS  
7 patients underwent MRI scans and neurological assessment using EDSS [1] at the time of  
8 participation in the study. SDMT (Symbol Digit Modalities Test) was also used to assess  
9 information processing speed and visual attention [2] in a subset of MS participants ( $n=60$ ) for  
10 whom we had SDMT scores (**eTable 1 supplemental results**). SDMT was used to screen for  
11 cognitive impairment [3]. Levels of fatigue and depression were also assessed as previously  
12 described [4] and reported in the **eTable 2 (supplemental results)**. Clinical and demographic  
13 data for the whole MS group and the RRMS, PPMS and SPMS phenotypes are summarised in  
14 **Table 1**.

## 15 B. MRI data acquisition

16 MRI data were acquired using a Philips Achieva 3T MR scanner (Philips Healthcare, Best,  
17 Netherlands) with a 32-channel head coil. The whole brain High Angular Resolution Diffusion  
18 Imaging (HARDI) scan consisted of a cardiac-gated spin-echo (SE) sequence with echo planar  
19 imaging (EPI) readout: TR = 4000 ms; TE = 68 ms; 72 axial slices with an isotropic resolution  
20 of  $2 \times 2 \times 2$  mm<sup>3</sup>; 61 volumes with non-collinear diffusion gradients (b-value of 1200 s mm<sup>-2</sup>)  
21 and 7 volumes without directional weighting. 3D sagittal T1-weighted scans were acquired  
22 using a fast-field echo scan: TR=6.9 ms; TE=3.1 ms; inversion time=824.5 ms, resolution =  
23  $1 \times 1 \times 1$  mm<sup>3</sup>. For each subject, dual-echo proton density/T2-weighted axial oblique-scans

24 aligned with the anterior to posterior commissure were also acquired: TR=3500 ms, TE=19/85  
25 ms, and 50 axial slices, resolution = 1x1x3 mm<sup>3</sup>, field of view 240x180 mm<sup>2</sup>. All data were  
26 acquired with slices aligned with the anterior commissure (AC) – posterior commissure (PC)  
27 line to minimise the effect of head positioning on data analysis

### 28 **C. Structural imaging processing**

29 Anatomical T1-weighted images were bias field corrected using the N4 algorithm [5]. For WM  
30 lesion detection, T2-hyperintense lesions were manually delineated by two experienced raters  
31 (SvdP and DC) from the PD-T2-weighted scans using JIM (v6.0, Xinapse Systems, Aldwincle,  
32 UK).

#### 33 **Registration between T1-weighted and diffusion-weighted images**

34 A non-rigid transformation was performed to register the subject's non-filled T1-weighted  
35 image to the corresponding diffusion-weighting image (DWI) using BrainSuite [6]. The target  
36 volume was the first b=0 image after DWI pre-processing, resulting in a structural image of  
37 resolution 2x2x2 mm<sup>3</sup>. The purpose of registering the structural images to the diffusion images  
38 at this stage is two-fold: a) matching the voxel dimensions and positions of the T1-scan to that  
39 of DWI means that any subsequent image derived from the anatomical scan will be inherently  
40 aligned to the DWI; and b) aligning the anatomical image to the DWI and not the other way  
41 around ensures that a re-orientation of the gradient direction is not required.

#### 42 **Tissue segmentation and parcellation**

43 We non-rigidly transformed the lesions to DWI space and then filled the T1-weighted images  
44 in this space using a modality-agnostic patch-based method [7]. The reason that we registered  
45 we registered the T1-image in DWI space before lesion filling so that we matched all the  
46 anatomical features between the two modalities including lesions. Hence, we ensured that the  
47 non-rigid registration was not affected by the lesion filling. The filled T1-weighted images

48 were then segmented into cortical grey matter, white matter, deep grey matter, brainstem and  
49 cerebrospinal fluid (CSF) and parcellated into anatomically distinct regions according to  
50 Desikan–Killiany–Tourville atlas protocol using the GIF framework [8]. This method has been  
51 previously used in different neurological diseases such as MS [9], dementia [10] and epilepsy  
52 [11] GIF is freely available as web-service at <http://cmictig.cs.ucl.ac.uk/niftyweb> [12]. We then  
53 estimated the volumes of the various tissue types (NABV (normal appearing brain volume  
54 (BV)), GM, CGM (cortical GM), DGM (deep GM)). Reduction of these volumes reflects  
55 atrophy. LL (lesion load) was also computed as a measure of WM focal damage.

56

#### 89 **D. Diffusion-weighted imaging processing**

##### 90 **B0 registration, eddy current and susceptibility induced correction**

91 The mean b0 image was rigid registered to the first b0 image. Then, the same rigid  
92 transformation was applied to the 61 DWI volumes. FSL v5.0.9 was used on the DWI data to  
93 correct for eddy current and head motion [13]. We also corrected for susceptibility induced  
94 distortions caused by EPI sequences using BrainSuite v.15b. This method uses the T1-weighted  
95 image as the registration-template to correct the diffusion data [6].

##### 96 **Model response function and Constrained Spherical Deconvolution**

97 For the subsequent steps, we used MRtrix3 v0.3.14. We estimated the response function [14],  
98 the signal expected from a voxel that contains a single coherent fibre bundle, and then we  
99 performed constrained spherical deconvolution (CSD) [15, 16] to estimate the voxel-wise fibre  
100 orientation distribution (FOD).

##### 101 **Whole-brain streamline tractography**

102 For each subject,  $10^7$  streamlines were generated. For the probabilistic tractography, the iFOD2  
103 algorithm [17] was employed using the default parameters – step size=1.25 mm, maximum

104 length=250 mm, implementing the anatomically constrained tractography (ACT) framework  
105 [18]. Spherical-deconvolution informed filtering of tractograms (SIFT2) was applied to the  
106 generated tractograms to modulate the contribution of each streamline to the relevant edge [19].  
107 In this way the streamline count is reflective of the underlying fibre density at the local level.  
108 When looking at the connection density of a particular pathway, this interpretation remains  
109 such that a larger region is likely to be intersected by a greater number of streamlines. In fact,  
110 Yeh, Smith [20] showed that the application of ACT and SIFT2 (both techniques were also  
111 applied in our study) improves the biological accuracy of the reconstructed connectome while  
112 other scaling methods provide only incomplete correction.

113

#### 114 **E. Network reconstruction**

115 GM parcellations constituted the network nodes, 120 in total. Each network edge was defined  
116 as the sum of weights of streamlines connecting a pair of nodes [19]. The pipeline is  
117 summarised in **Fig. 1**. To assess the network topology, we extracted the following network  
118 measures:

119 Edge Density: also known as connectivity, this is defined as the percentage of connections that  
120 exist relative to the potential number of network connections [21].

121 Global efficiency: is the average of the inverse of the distance matrix of the entire network  
122 matrix [22]. It is a measure of the overall information transfer efficiency across the whole  
123 network.

124 Local efficiency: similar to global efficiency, it is defined as the average of the inverse distance  
125 matrix but in a sub-cluster of the network [22]. It is considered as a measure of the local  
126 information flow. As this is a node-specific measure we average over all the nodes to get the  
127 mean local efficiency metric.

128 Clustering coefficient: is also a node-specific measure which describes local organisation  
129 reflecting the number of connections between the neighbours of each node [23]. Averaging  
130 over all the nodes provides the mean clustering coefficient.

131           The metrics were derived using the TractoR [24] package. In this study, we used the  
132 weighted forms of the graph-derived metrics, except for density, which by definition is derived  
133 from a binary network.

134

135

136

137

## 138 Bibliography for supplemental methods

- 139 1. Kurtzke, J.F., *Rating neurologic impairment in multiple sclerosis: an expanded*  
140 *disability status scale (EDSS)*. Neurology, 1983. **33**(11): p. 1444-52.
- 141 2. Van Schependom, J., et al., *The Symbol Digit Modalities Test as sentinel test for*  
142 *cognitive impairment in multiple sclerosis*. Eur J Neurol, 2014. **21**(9): p. 1219-25,  
143 e71-2.
- 144 3. Parmenter, B.A., et al., *Screening for cognitive impairment in multiple sclerosis using*  
145 *the Symbol digit Modalities Test*. Mult Scler, 2007. **13**(1): p. 52-7.
- 146 4. Zigmond, A.S. and R.P. Snaith, *The hospital anxiety and depression scale*. Acta  
147 Psychiatr Scand, 1983. **67**(6): p. 361-70.
- 148 5. Tustison, N.J., et al., *N4ITK: improved N3 bias correction*. IEEE Trans Med Imaging,  
149 2010. **29**(6): p. 1310-20.
- 150 6. Bhushan, C., et al., *Correcting Susceptibility-Induced Distortion in Diffusion-*  
151 *Weighted MRI using Constrained Nonrigid Registration*. Signal Inf Process Assoc  
152 Annu Summit Conf APSIPA Asia Pac, 2012. **2012**.
- 153 7. Prados, F., et al., *A multi-time-point modality-agnostic patch-based method for lesion*  
154 *filling in multiple sclerosis*. Neuroimage, 2016. **139**: p. 376-384.
- 155 8. Cardoso, M.J., et al., *Geodesic Information Flows: Spatially-Variant Graphs and*  
156 *Their Application to Segmentation and Fusion*. IEEE Trans Med Imaging, 2015.  
157 **34**(9): p. 1976-88.
- 158 9. Eshaghi, A., et al., *Deep grey matter volume loss drives disability worsening in*  
159 *multiple sclerosis*. Ann Neurol, 2018.
- 160 10. Premi, E., et al., *Cognitive reserve and TMEM106B genotype modulate brain damage*  
161 *in presymptomatic frontotemporal dementia: a GENFI study*. Brain, 2017. **140**(6): p.  
162 1784-1791.
- 163 11. Taylor, N.P., et al., *The impact of epilepsy surgery on the structural connectome and*  
164 *its relation to outcome*. Neurons and Cognition, 2017.
- 165 12. Prados, F., et al. *NiftyWeb: web based platform for image processing on the cloud*. in  
166 *24th Scientific Meeting and Exhibition of the International Society for Magnetic*  
167 *Resonance in Medicine (ISMRM)*. 2016. ISMRM.
- 168 13. Andersson, J.L. and S.N. Sotiropoulos, *An integrated approach to correction for off-*  
169 *resonance effects and subject movement in diffusion MR imaging*. Neuroimage, 2016.  
170 **125**: p. 1063-78.
- 171 14. Tax, C.M., et al., *Recursive calibration of the fiber response function for spherical*  
172 *deconvolution of diffusion MRI data*. Neuroimage, 2014. **86**: p. 67-80.
- 173 15. Tournier, J.D., F. Calamante, and A. Connelly, *Robust determination of the fibre*  
174 *orientation distribution in diffusion MRI: non-negativity constrained super-resolved*  
175 *spherical deconvolution*. Neuroimage, 2007. **35**(4): p. 1459-72.
- 176 16. Tournier, J.D., et al., *Direct estimation of the fiber orientation density function from*  
177 *diffusion-weighted MRI data using spherical deconvolution*. Neuroimage, 2004.  
178 **23**(3): p. 1176-85.
- 179 17. Tournier, J.D., F. Calamante, and A. Connelly, *Improved probabilistic streamlines*  
180 *tractography by 2nd order integration over fibre orientation distributions*. Joint  
181 Annual Meeting ISMRM-ESMRMB 2010.
- 182 18. Smith, R.E., et al., *Anatomically-constrained tractography: improved diffusion MRI*  
183 *streamlines tractography through effective use of anatomical information*.  
184 Neuroimage, 2012. **62**(3): p. 1924-38.

- 185 19. Smith, R.E., et al., *SIFT2: Enabling dense quantitative assessment of brain white*  
186 *matter connectivity using streamlines tractography*. Neuroimage, 2015. **119**: p. 338-  
187 51.
- 188 20. Yeh, C.H., et al., *Correction for diffusion MRI fibre tracking biases: The*  
189 *consequences for structural connectomic metrics*. Neuroimage, 2016. **142**: p. 150-  
190 162.
- 191 21. Kaiser, M., *A tutorial in connectome analysis: topological and spatial features of*  
192 *brain networks*. Neuroimage, 2011. **57**(3): p. 892-907.
- 193 22. Latora, V. and M. Marchiori, *Efficient behavior of small-world networks*. Phys Rev  
194 Lett, 2001. **87**(19): p. 198701.
- 195 23. Watts, D.J. and S.H. Strogatz, *Collective dynamics of 'small-world' networks*. Nature,  
196 1998. **393**(6684): p. 440-2.
- 197 24. Clayden, J., et al., *TractoR: Magnetic Resonance Imaging and Tractography with R*.  
198 JSS, 2011.
- 199
